# Supplementary material for: Targeting CD47 as a Novel Immunotherapy for Multiple Myeloma
Source: MDPI journal article supplement (doi:10.3390/cancers12020305), 2020-01-28
Supplement: s1 [file s1]

## Supplementary Figures

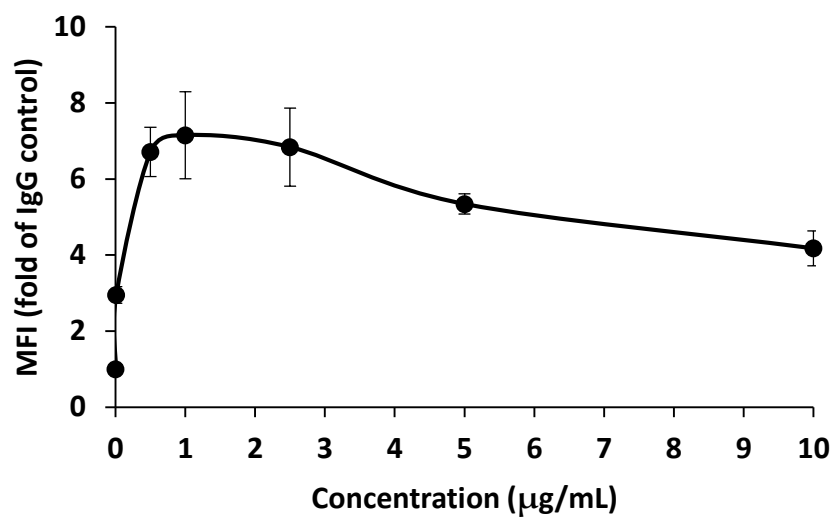

Figure S1. Vx1000R binding curve on MM.1S cell line.

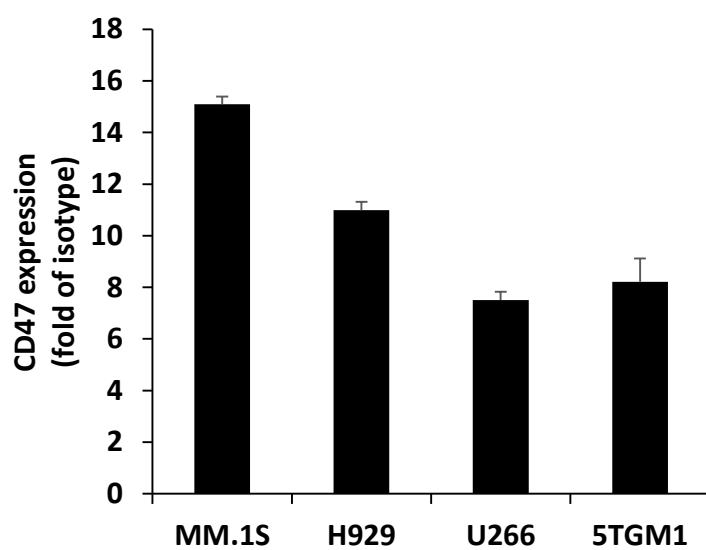

Figure S2. CD47 protein expression of MM cell lines under 2D normoxic (21%  $\text{O}_2$ ) condition.

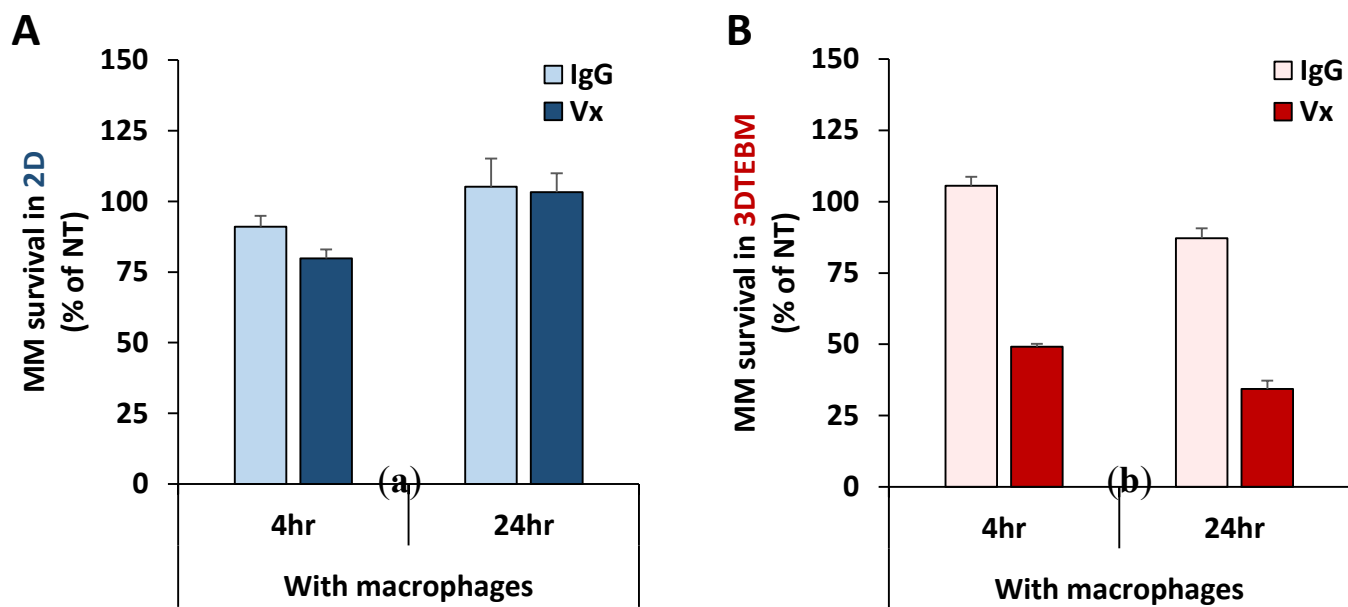

**Figure S3.** The effect of Vx1000R treatment in MM survival in MM-macrophage co-cultures at 4 h and 24 h in (a) 2D and (b) 3DTEBM cultures.
